# Supplementary material for: Psychometric evaluation of a parent-rating and self-rating inventory for pediatric obsessive-compulsive disorder: German OCD Inventory for Children and Adolescents (OCD-CA)
Source: Springer Nature journal article supplement (doi:10.1186/s13034-019-0286-z), 2019-06-18
Supplement: MOESM1 [file 16823478]

### Additional File 1

Results from confirmatory factor analyses based on the four-factor solution by Waclawiak (2006; unpublished)

*The tested model/ four-factor solution found by Waclawiak (2006, unpublished)*

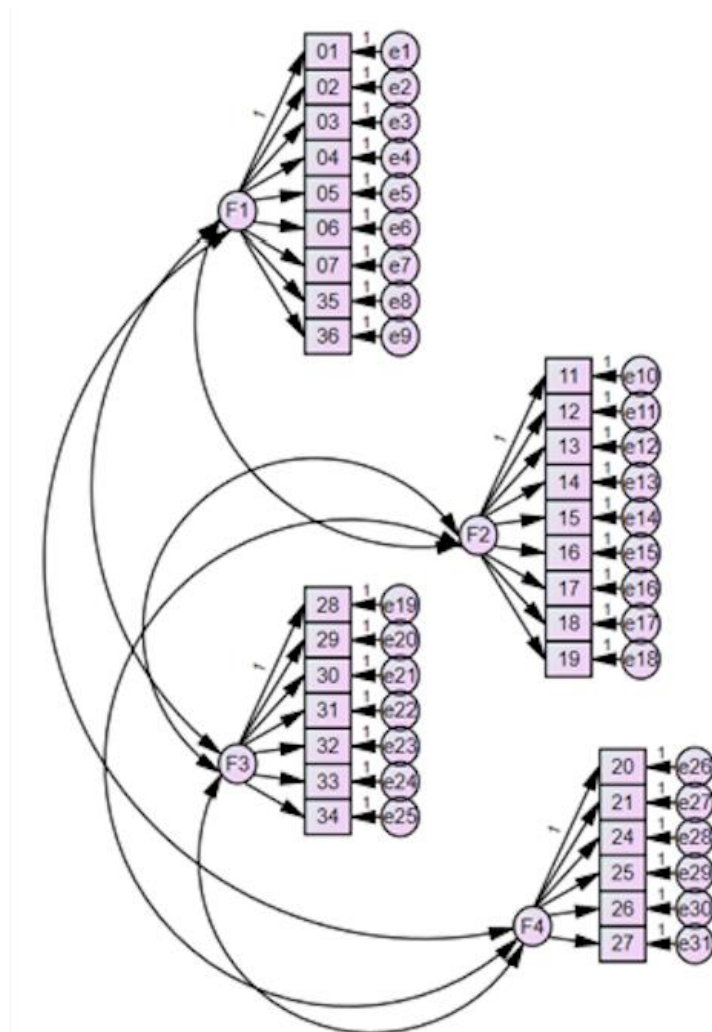

| F1=Factor 1                                        | F2=Factor 2                                                   | F3=Factor 3                                              | F4=Factor 4                                             |
|----------------------------------------------------|---------------------------------------------------------------|----------------------------------------------------------|---------------------------------------------------------|
| Item 01: Hands feel dirty                          | Item 11: Doing things several times                           | Item 28: Unnecessary concerns                            | Item 20: Certain number                                 |
| Item 02: Difficulties to touch certain objects     | Item 12: Repetitive checking more often than necessary        | Item 29: Fear of something bad happening                 | Item 21: Counting                                       |
| Item 03: Difficulties to touch garbage             | Item 13: Checking and rechecking water taps or light switches | Item 30: Worrying about having hurt someone              | Item 24: Certain actions to avoid misfortune            |
| Item 04: Avoiding using public toilets             | Item 14: Checking doors, windows or drawers                   | Item 31: Fear of being to blame for catastrophes         | Item 25: Certain numbers or words to keep away bad luck |
| Item 05: Intensive hand-washing                    | Item 15: Checking homework                                    | Item 32: Worrying about having a disease                 | Item 26: Recurrent thoughts                             |
| Item 06: Hand-washing due to fear of contamination | Item 16: Checking matches, candles etc.                       | Item 33: Getting worried at the sight of pointed objects | Item 27: Reassurance-seeking                            |
| Item 07: Washing due to thoughts of being dirty    | Item 17: Counting and recounting money                        | Item 34: Getting upset when hearing about a crime        |                                                         |
| Item 35: Useless worries about germs or toxins     | Item 18: Rereading texts several times                        |                                                          |                                                         |
| Item 36: Disgust for perspiration or urine         | Item 19: Repeating actions                                    |                                                          |                                                         |

Note: The model was tested using AMOS [Arbuckle JL. Amos (Version 23.0) [Computer Program]. IBM SPSS: Chicago; 2014.]

*Results from confirmatory factor analyses based on the four-factor solution by Waclawiak (2006, unpublished)*

| <b>Sample</b> | <b><math>\chi^2</math> test</b>        | <b>RMSEA</b> | <b>90%CI</b> | <b>SRMR</b>    | <b>CFI</b> | <b>TLI</b> |
|---------------|----------------------------------------|--------------|--------------|----------------|------------|------------|
| CLIN          | $\chi^2$ (df=428)= 1553.380, p=.001    | .09          | .08-.09      | <b>.08</b>     | <b>.81</b> | <b>.80</b> |
|               | ( $\chi^2$ (df=428)= 1205.661, p=.001) | (.09)        | (.09-.10)    | ( <b>.08</b> ) | (.75)      | (.73)      |
| OCDS          | $\chi^2$ (df=428)= 1036.113, p=.001    | .09          | .08-.10      | <b>.09</b>     | .78        | .76        |
|               | ( $\chi^2$ (df=428)= 1005.776, p=.004) | (.10)        | (.09-.11)    | ( <b>.09</b> ) | (.70)      | (.67)      |

*Note:* CLIN: parent form: n=342, (self-report form: n=218); OCDS: parent form: n=181, (self-report form=134); values printed in bold met cut-off criteria for goodness of model fit.
