# Supplementary material for: Psychometric evaluation of a parent-rating and self-rating inventory for pediatric obsessive-compulsive disorder: German OCD Inventory for Children and Adolescents (OCD-CA)
Source: Springer Nature journal article supplement (doi:10.1186/s13034-019-0286-z), 2019-06-18
Supplement: MOESM2 [file 16823478]

**Additional file 2**

Exploratory principal component analysis with varimax rotation, four-factor solution

| Item                                                             | Parent form: Factors |     |            |            | Self-report form: Factors |            |            |            |
|------------------------------------------------------------------|----------------------|-----|------------|------------|---------------------------|------------|------------|------------|
|                                                                  | 1                    | 2   | 3          | 4          | 1                         | 2          | 3          | 4          |
| <b><i>Contamination &amp; Washing</i></b>                        |                      |     |            |            |                           |            |            |            |
| 1. Hands feel dirty                                              | <b>.86</b>           |     |            |            |                           | <b>.78</b> |            |            |
| 2. Difficulties to touch certain objects                         | <b>.82</b>           |     |            |            |                           | <b>.73</b> |            |            |
| 3. Difficulties to touch garbage                                 | <b>.82</b>           |     |            |            |                           | <b>.75</b> |            |            |
| 4. Avoiding using public toilets                                 | <b>.76</b>           |     |            |            |                           | <b>.65</b> |            |            |
| 5. Intensive hand-washing                                        | <b>.83</b>           |     |            |            |                           | <b>.73</b> | .32        |            |
| 6. Hand-washing due to fear of contamination                     | <b>.85</b>           |     |            |            |                           | <b>.71</b> | .28        |            |
| 7. Washing due to thoughts of being dirty                        | <b>.88</b>           |     |            |            |                           | <b>.71</b> |            |            |
| 35. Useless worries about germs or toxins                        | <b>.57</b>           |     |            |            | .40                       | <b>.54</b> |            |            |
| 36. Disgust for perspiration or urine                            | <b>.72</b>           | .50 |            |            |                           | <b>.61</b> |            |            |
| <b><i>Catastrophes &amp; Injuries</i></b>                        |                      |     |            |            |                           |            |            |            |
| 24. Certain actions to avoid misfortune                          | <b>.66</b>           |     | .39        |            | .51                       |            | .44        | <b>.29</b> |
| 25. Certain numbers or words to keep away bad luck               | <b>.56</b>           |     | .33        |            | .31                       |            | .55        | <b>.34</b> |
| 26. Recurrent thoughts                                           | <b>.62</b>           | .25 |            |            | .53                       |            |            | <b>.45</b> |
| 27. Reassurance-seeking                                          | <b>.67</b>           | .27 |            |            | <b>.67</b>                |            |            |            |
| 28. Unnecessary concerns                                         | <b>.75</b>           | .29 |            |            | .58                       |            |            | <b>.42</b> |
| 29. Fear of something bad happening                              | <b>.66</b>           | .41 |            |            | .65                       |            |            | <b>.30</b> |
| 30. Worrying about having hurt someone                           | <b>.50</b>           | .33 |            |            | .44                       |            |            | <b>.45</b> |
| 31. Fear of being to blame for catastrophes                      | <b>.61</b>           |     |            |            |                           |            |            | <b>.63</b> |
| 32. Worrying about having a disease                              | <b>.67</b>           |     |            |            | .51                       |            |            | <b>.37</b> |
| 33. Getting worried at the sight of pointed objects              | <b>.43</b>           |     |            |            |                           |            |            | <b>.64</b> |
| 34. Getting upset when hearing about a crime                     | <b>.69</b>           |     |            |            |                           |            |            | <b>.74</b> |
| <b><i>Checking</i></b>                                           |                      |     |            |            |                           |            |            |            |
| 12. Repetitive checking more often than necessary                |                      |     | <b>.56</b> | .44        |                           | <b>.75</b> |            |            |
| 13. Checking and rechecking water taps or light switches         |                      |     | <b>.67</b> |            |                           | <b>.72</b> |            |            |
| 14. Checking doors, windows or drawers                           |                      |     | <b>.73</b> |            |                           | <b>.65</b> |            |            |
| 15. Checking homework                                            |                      |     | <b>.70</b> | .25        |                           | <b>.39</b> |            |            |
| 16. Checking matches, candles etc.                               |                      | .26 | <b>.65</b> |            |                           | <b>.49</b> |            |            |
| 17. Counting and recounting money                                |                      |     | <b>.59</b> |            | <b>.26</b>                |            | .25        | .53        |
| 18. Rereading texts several times                                |                      |     | <b>.58</b> |            |                           |            | <b>.53</b> | .43        |
| 22. Hoarding and saving                                          |                      |     | .36        |            |                           |            |            | .64        |
| <b><i>Ordering &amp; Repeating</i></b>                           |                      |     |            |            |                           |            |            |            |
| 8. Following a particular order in washing                       | .40                  |     |            | <b>.65</b> |                           | .32        |            | <b>.63</b> |
| 9. Doing certain things in a certain order before going to sleep |                      |     |            | <b>.61</b> |                           |            |            | <b>.70</b> |
| 10. Hanging up or folding clothes in a special way               |                      |     |            | <b>.65</b> |                           |            |            | <b>.72</b> |
| 11. Doing things several times                                   |                      |     | .42        | <b>.69</b> | .57                       |            |            | <b>.40</b> |
| 19. Repeating actions                                            |                      | .31 | .30        | <b>.65</b> | .41                       |            |            | <b>.53</b> |
| 20. Certain number                                               |                      | .28 |            | .67        |                           |            | .60        | .33        |
| 21. Counting                                                     |                      |     |            | .55        |                           |            | .53        | .32        |
| 23. Not getting ready                                            | .27                  |     |            | .43        | .26                       |            |            |            |

Note: CLIN: parent form: n=342, self-report form: n=218; abbreviated item content; factor loadings > .25
