# Supplementary material for: Psychometric evaluation of a parent-rating and self-rating inventory for pediatric obsessive-compulsive disorder: German OCD Inventory for Children and Adolescents (OCD-CA)
Source: Springer Nature journal article supplement (doi:10.1186/s13034-019-0286-z), 2019-06-18
Supplement: MOESM3 [file 16823478]

**Additional file 3**

Parent form: Intercorrelations between the subscales

| Scale                                     | Parent form       |                           |                   |                             |                      |                             |
|-------------------------------------------|-------------------|---------------------------|-------------------|-----------------------------|----------------------|-----------------------------|
|                                           | CAT               |                           | CHECK             |                             | Ordering & Repeating |                             |
|                                           | 6-10<br>years old | 11-18<br>years old        | 6-10<br>years old | 11-18<br>years old          | 6-10<br>years old    | 11-18<br>years old          |
| <b>Contamination &amp; Washing (CONT)</b> | .56**<br>{.47**}  | .36**<br>{.11}<br>(.55**) | .23*<br>{.05}     | .29**<br>{.06}<br>(.65**)   | .46**<br>{.33*}      | .35**<br>{.08}<br>(.60**)   |
| <b>Catastrophes &amp; Injuries (CAT)</b>  |                   |                           | .31**<br>{.15}    | .54**<br>{.41**}<br>(.71**) | .40**<br>{.25}       | .45**<br>{.27**}<br>(.69**) |
| <b>Checking (CHECK)</b>                   |                   |                           |                   |                             | .61**<br>{.51**}     | .55**<br>{.43**}<br>(.71**) |

Note: CLIN, {OCDS}, (COS); 6-10 years old: n=110, {n=46}; 11-18 years old: n=232, {n=134}, (n=367);

\*p<.05, \*\*p<.01
