# Supplementary material for: Psychometric evaluation of a parent-rating and self-rating inventory for pediatric obsessive-compulsive disorder: German OCD Inventory for Children and Adolescents (OCD-CA)
Source: Springer Nature journal article supplement (doi:10.1186/s13034-019-0286-z), 2019-06-18
Supplement: MOESM4 [file 16823478]

**Additional file 4**

Self-report form: Intercorrelations between the subscales

| <b>Self-report form, 11-18 years old</b>  |                               |                               |                                 |
|-------------------------------------------|-------------------------------|-------------------------------|---------------------------------|
| <b>Scale</b>                              | <b>CAT</b>                    | <b>CHECK</b>                  | <b>Ordering &amp; Repeating</b> |
| <b>Contamination &amp; Washing (CONT)</b> | .43**<br>{ .32** }<br>(.53**) | .46**<br>{ .32** }<br>(.55**) | .44**<br>{ .28** }<br>(.54**)   |
| <b>Catastrophes &amp; Injuries (CAT)</b>  |                               | .71**<br>{ .68** }<br>(.63**) | .59**<br>{ .53** }<br>(.55**)   |
| <b>Checking (CHECK)</b>                   |                               |                               | .61**<br>{ .54** }<br>(.62**)   |

*Note:* CLIN: n=218, {OCDS: n=134}, (COS: n=367);

\*\*p&lt;.01
