# Supplementary material for: Psychometric evaluation of a parent-rating and self-rating inventory for pediatric obsessive-compulsive disorder: German OCD Inventory for Children and Adolescents (OCD-CA)
Source: Springer Nature journal article supplement (doi:10.1186/s13034-019-0286-z), 2019-06-18
Supplement: MOESM5 [file 16823478]

**Additional file 5**

OCDS: Correlations between the OCD-CA scales and internalizing and externalizing problems and symptoms

| OCD-CA Scales           | CBCL/ YSR                |                         | FBB-/SBB-DES             | FBB-/ SBB-ANZ            |
|-------------------------|--------------------------|-------------------------|--------------------------|--------------------------|
|                         | Internalizing Problems   | Externalizing Problems  | Total Score              | Total Score              |
| Contamination & Washing | .55** [.23**]<br>(.23**) | -.10 [.16]<br>(.20*)    | .45** [.15]<br>(.18*)    | .53** [.21*]<br>(.28*)   |
| Catastrophes & Injuries | .69** [.43**]<br>(.55**) | -.09 [.22*]<br>(.39**)  | .49** [.26**]<br>(.46**) | .63** [.63**]<br>(.68**) |
| Checking                | .10 [.23**]<br>(.47**)   | -.04 [.14]<br>(.32**)   | .06 [.16]<br>(.34**)     | .11 [.46**]<br>(.52**)   |
| Ordering & Repeating    | .23 [.30**]<br>(.33**)   | -.17 [.33**]<br>(.31**) | .28 [.32**]<br>(.33**)   | .25 [.27**]<br>(.38**)   |
| OCD Total               | .61** [.48**]<br>(.54**) | -.13 [.34**]<br>(.43**) | .52** [.37**]<br>(.45**) | .60** [.62**]<br>(.61**) |

*Note:* parent form: 6-10 years old and [11-18 years old] / (self-report form); parent form: CBCL: n=42, FBB-DES: n=40, FBB-ANZ: n=35, [CBCL: n=132, FBB-DES: n=127, FBB-ANZ: n=101]; self-report form: (YSR: n=130, SBB-DES: n=126, SBB-ANZ: n=101);

\*p<.05, \*\*p<.01
