# Supplementary material for: Psychometric evaluation of a parent-rating and self-rating inventory for pediatric obsessive-compulsive disorder: German OCD Inventory for Children and Adolescents (OCD-CA)
Source: Springer Nature journal article supplement (doi:10.1186/s13034-019-0286-z), 2019-06-18
Supplement: MOESM6 [file 16823478]

**Additional file 6**

COS: Correlations between the OCD-CA scales and internalizing and externalizing problems

| OCD-CA scales           | CBCL/ YSR              |                        |
|-------------------------|------------------------|------------------------|
|                         | Internalizing Problems | Externalizing Problems |
| Contamination & Washing | .39**<br>(.23**)       | .27**<br>(.22**)       |
| Catastrophes & Injuries | .65**<br>(.43**)       | .47**<br>(.37**)       |
| Checking                | .44**<br>(.28**)       | .23**<br>(.22**)       |
| Ordering & Repeating    | .45**<br>(.22**)       | .24**<br>(.19**)       |
| OCD Total               | .60**<br>(.39**)       | .40**<br>(.34**)       |

Note: parent form/ (self-report form); parent form: CBCL: n=246-257; self-report form: (YSR: n=354-357);  
\*p<.05, \*\*p<.01;
