# Supplementary material for: Psychometric evaluation of a parent-rating and self-rating inventory for pediatric obsessive-compulsive disorder: German OCD Inventory for Children and Adolescents (OCD-CA)
Source: Springer Nature journal article supplement (doi:10.1186/s13034-019-0286-z), 2019-06-18
Supplement: MOESM7 [file 16823478]

**Additional file 7**

OCDS: Correlations between the OCD-CA scales of the parent form/ (self-report form) and the CY-BOCS-D

| OCD-CA scales           | CY-BOCS-D Rating Scale |                                                   | CY-BOCS-D Checklist Scales                     |                            |                                                              |                         |
|-------------------------|------------------------|---------------------------------------------------|------------------------------------------------|----------------------------|--------------------------------------------------------------|-------------------------|
|                         | OCD total Severity     | Obsessions regarding loss of control and religion | Checking, harm avoidance and sexual obsessions | Contamination and Cleaning | Repeating, ordering/arranging, hoarding and magical thinking | OCD Total               |
| Contamination & Washing | .10<br>(.27)           | -.13<br>(-.01)                                    | -.07<br>(.03)                                  | <b>.69**</b><br>(.75**)    | -.15<br>(.01)                                                | .13<br>(.32**)          |
| Catastrophes & Injuries | .19<br>(.41**)         | <b>.32**</b><br>(.30**)                           | <b>.38**</b><br>(.60**)                        | -.08<br>(-.09)             | <b>.12</b><br>(.39**)                                        | .28**<br>(.49**)        |
| Checking                | .27<br>(.38*)          | .02<br>(.15)                                      | <b>.43**</b><br>(.54**)                        | -.01<br>(-.02)             | .20<br>(.37**)                                               | .27**<br>(.44**)        |
| Ordering & Repeating    | -.03<br>(.51**)        | -.13<br>(.17)                                     | .07<br>(.28**)                                 | .10<br>(.11)               | <b>.23*</b><br>(.48**)                                       | .12<br>(.44**)          |
| OCD-CA Total            | .21<br>(.53**)         | .04<br>(.23*)                                     | .26*<br>(.49**)                                | .36**<br>(.27**)           | .13<br>(.44**)                                               | <b>.32**</b><br>(.60**) |

Note: OCDS: 11-18 years old; CY-BOCS-D Rating Scale: n=44, (n=44); CY-BOCS-D Checklist Scales: n=90, (n=92);

\*p<.05, \*\*p<=.01
