# Supplementary material for: Psychometric evaluation of a parent-rating and self-rating inventory for pediatric obsessive-compulsive disorder: German OCD Inventory for Children and Adolescents (OCD-CA)
Source: Springer Nature journal article supplement (doi:10.1186/s13034-019-0286-z), 2019-06-18
Supplement: MOESM8 [file 16823478]

**Additional file 8**

Comparison of OCD-CA parent ratings in the OCDS and non-OCD in children aged 6 to 10 years old

| Scale                   | OCDS          | Non-OCD       | <i>t</i> |
|-------------------------|---------------|---------------|----------|
|                         | <i>M (SD)</i> | <i>M (SD)</i> |          |
| Contamination & Washing | 8.37 (9.04)   | 1.98 (3.43)   | 4.56**   |
| Catastrophes & Injuries | 8.33 (8.96)   | 2.20 (3.03)   | 4.46**   |
| Checking                | 3.50 (5.05)   | 0.70 (1.35)   | 3.66**   |
| Ordering & Repeating    | 5.80 (5.12)   | 1.22 (2.41)   | 5.64**   |
| OCD Total               | 29.63 (21.62) | 8.17 (8.15)   | 6.41**   |

---

*Note:* OCDS: n=46, Non-OCD: n=64; \*\*p<=.001
