# Supplementary material for: Psychometric evaluation of a parent-rating and self-rating inventory for pediatric obsessive-compulsive disorder: German OCD Inventory for Children and Adolescents (OCD-CA)
Source: Springer Nature journal article supplement (doi:10.1186/s13034-019-0286-z), 2019-06-18
Supplement: MOESM9 [file 16823478]

**Additional file 9**

Comparison of means between self- and parent-report form

| Scale                   | OCD-CA                       |                                | <i>t</i>   |
|-------------------------|------------------------------|--------------------------------|------------|
|                         | Self-report<br><i>M (SD)</i> | Parent report<br><i>M (SD)</i> |            |
| Contamination & Washing | 9.96 (8.40)                  | 12.86 (10.90)                  | -4.01**    |
|                         | (5.54 (4.77))                | (2.89 (4.05))                  | (-9.47**)  |
| Catastrophes & Injuries | 9.72 (9.19)                  | 8.98 (8.42)                    | 0.91       |
|                         | (5.49 (5.65))                | (1.94 (3.50))                  | (-11.87**) |
| Checking                | 5.54 (5.43)                  | 4.19 (5.12)                    | 3.09*      |
|                         | (4.59 (4.03))                | (1.43 (2.54))                  | (-15.11**) |
| Ordering & Repeating    | 5.56 (4.50)                  | 6.01 (5.24)                    | -0.99      |
|                         | (1.51 (2.08))                | (0.65 (1.67))                  | (-8.28**)  |
| OCD Total               | 34.31 (23.26)                | 35.43 (20.56)                  | -0.56      |
|                         | (19.39 (14.83))              | (8.16 (11.01))                 | (-13.98**) |

Note: OCDS: n=134; (COS: n=367); \*p<.01, \*\*p<.001
