# Supplementary material for: Psychometric evaluation of a parent-rating and self-rating inventory for pediatric obsessive-compulsive disorder: German OCD Inventory for Children and Adolescents (OCD-CA)
Source: Springer Nature journal article supplement (doi:10.1186/s13034-019-0286-z), 2019-06-18
Supplement: MOESM10 [file 16823478]

**Additional file 10**

CLIN: Comparison of means between age groups and gender in the parent form (ANOVA)

| Scale                   | 6-10 years old | N   | M (SD)        | 11-18 years old<br>N | M (SD)        | Age effect<br>F | Gender effect<br>F | Interaction<br>F |
|-------------------------|----------------|-----|---------------|----------------------|---------------|-----------------|--------------------|------------------|
| Contamination & Washing | <i>Overall</i> | 110 | 4.65 (7.11)   | 232                  | 8.86 (10.33)  | 14.15**         | 0.44               | 0.20             |
|                         | <i>Males</i>   | 72  | 4.57 (7.50)   | 134                  | 8.33 (10.79)  |                 |                    |                  |
|                         | <i>Females</i> | 38  | 4.82 (6.40)   | 98                   | 9.59 (9.67)   |                 |                    |                  |
| Catastrophes & Injuries | <i>Overall</i> | 110 | 4.76 (6.90)   | 232                  | 6.57 (8.03)   | 4.36*           | 2.79               | 1.12             |
|                         | <i>Males</i>   | 72  | 4.57 (7.17)   | 134                  | 5.51 (7.64)   |                 |                    |                  |
|                         | <i>Females</i> | 38  | 5.13 (6.43)   | 98                   | 8.02 (8.34)   |                 |                    |                  |
| Checking                | <i>Overall</i> | 110 | 1.87 (3.68)   | 232                  | 3.00 (4.45)   | 4.51*           | 4.48*              | 0.09             |
|                         | <i>Males</i>   | 72  | 1.56 (3.26)   | 134                  | 2.48 (4.13)   |                 |                    |                  |
|                         | <i>Females</i> | 38  | 2.47 (4.34)   | 98                   | 3.69 (4.79)   |                 |                    |                  |
| Ordering & Repeating    | <i>Overall</i> | 110 | 3.14 (4.40)   | 232                  | 3.94 (4.98)   | 1.85            | 2.55               | 0.12             |
|                         | <i>Males</i>   | 72  | 2.89 (4.66)   | 134                  | 3.47 (4.78)   |                 |                    |                  |
|                         | <i>Females</i> | 38  | 3.61 (3.87)   | 98                   | 4.59 (5.19)   |                 |                    |                  |
| OCD Total               | <i>Overall</i> | 110 | 17.15 (18.56) | 232                  | 25.04 (22.70) | 9.72**          | 3.60               | 0.63             |
|                         | <i>Males</i>   | 72  | 16.17 (20.36) | 134                  | 22.13 (23.53) |                 |                    |                  |
|                         | <i>Females</i> | 38  | 19.00 (14.61) | 98                   | 29.03 (20.99) |                 |                    |                  |

Note: age groups: 6-10 years old and 11-18 years old; \*p<.05, \*\*p<.01
