# Supplementary material for: Psychometric evaluation of a parent-rating and self-rating inventory for pediatric obsessive-compulsive disorder: German OCD Inventory for Children and Adolescents (OCD-CA)
Source: Springer Nature journal article supplement (doi:10.1186/s13034-019-0286-z), 2019-06-18
Supplement: MOESM11 [file 16823478]

**Additional file 11**

OCDS: Comparison of means between age groups and gender in the parent form (ANOVA)

| Scale                   | 6-10 years old | N  | M (SD)        | 11-18 years old | N   | M (SD)        | Age effect F | Gender effect F | Interaction F |
|-------------------------|----------------|----|---------------|-----------------|-----|---------------|--------------|-----------------|---------------|
| Contamination & Washing | <i>Overall</i> | 46 | 8.37 (9.04)   | <i>Overall</i>  | 135 | 13.06 (10.91) | 7.35*        | 2.24            | 0.09          |
|                         | <i>Males</i>   | 25 | 9.84 (10.29)  | <i>Males</i>    | 66  | 14.15 (11.68) |              |                 |               |
|                         | <i>Females</i> | 21 | 6.62 (7.14)   | <i>Females</i>  | 69  | 12.01 (10.10) |              |                 |               |
| Catastrophes & Injuries | <i>Overall</i> | 46 | 8.33 (8.96)   | <i>Overall</i>  | 135 | 9.28 (8.53)   | 0.53         | 0.54            | 1.93          |
|                         | <i>Males</i>   | 25 | 9.76 (9.93)   | <i>Males</i>    | 66  | 8.79 (7.89)   |              |                 |               |
|                         | <i>Females</i> | 21 | 6.62 (7.52)   | <i>Females</i>  | 69  | 9.75 (9.13)   |              |                 |               |
| Checking                | <i>Overall</i> | 46 | 3.50 (5.05)   | <i>Overall</i>  | 135 | 4.36 (5.08)   | 0.85         | 1.49            | 0.00          |
|                         | <i>Males</i>   | 25 | 3.04 (4.92)   | <i>Males</i>    | 66  | 3.79 (4.97)   |              |                 |               |
|                         | <i>Females</i> | 21 | 4.05 (5.27)   | <i>Females</i>  | 69  | 4.90 (5.16)   |              |                 |               |
| Ordering & Repeating    | <i>Overall</i> | 46 | 5.80 (5.12)   | <i>Overall</i>  | 135 | 6.10 (5.32)   | 0.12         | 0.00            | 0.36          |
|                         | <i>Males</i>   | 25 | 6.08 (5.95)   | <i>Males</i>    | 66  | 5.85 (5.46)   |              |                 |               |
|                         | <i>Females</i> | 21 | 5.48 (4.04)   | <i>Females</i>  | 69  | 6.33 (5.21)   |              |                 |               |
| OCD Total               | <i>Overall</i> | 46 | 29.63 (21.62) | <i>Overall</i>  | 135 | 36.30 (20.70) | 3.73         | 0.58            | 1.10          |
|                         | <i>Males</i>   | 25 | 32.60 (26.48) | <i>Males</i>    | 66  | 35.77 (21.69) |              |                 |               |
|                         | <i>Females</i> | 21 | 26.10 (13.64) | <i>Females</i>  | 69  | 36.80 (19.96) |              |                 |               |

Note: age groups: 6-10 years old and 11-18 years old; \*\*p<.05
