# Supplementary material for: Psychometric evaluation of a parent-rating and self-rating inventory for pediatric obsessive-compulsive disorder: German OCD Inventory for Children and Adolescents (OCD-CA)
Source: Springer Nature journal article supplement (doi:10.1186/s13034-019-0286-z), 2019-06-18
Supplement: MOESM12 [file 16823478]

**Additional file 12**

Comparison of means between boys and girls

| Scale                   | Parent form           |                        |          | Self-report form      |                        |          |
|-------------------------|-----------------------|------------------------|----------|-----------------------|------------------------|----------|
|                         | Boys<br><i>M (SD)</i> | Girls<br><i>M (SD)</i> | <i>t</i> | Boys<br><i>M (SD)</i> | Girls<br><i>M (SD)</i> | <i>t</i> |
| Contamination & Washing |                       |                        |          | 7.07 (8.16)           | 8.27 (7.81)            | -1.10    |
|                         |                       |                        |          | {10.05 (9.14)}        | {9.88 (7.69)}          | {0.11}   |
|                         | (2.45 (3.71))         | (3.19 (4.25))          | (-4.21)  | (5.82 (4.98))         | (5.36 (4.63))          | (0.91)   |
| Catastrophes & Injuries |                       |                        |          | 6.09 (7.43)           | 9.42 (8.95)            | -2.93**  |
|                         |                       |                        |          | {8.48 (8.80)}         | {10.88 (9.47)}         | {-1.52}  |
|                         | (1.67 (3.05))         | (2.12 (3.76))          | (-2.23)  | (5.58 (5.86))         | (5.43 (5.52))          | (0.25)   |
| Checking                |                       |                        |          | 4.01 (4.95)           | 4.88 (4.74)            | -1.32    |
|                         |                       |                        |          | {5.22 (6.07)}         | {5.86 (4.77)}          | {-0.68}  |
|                         | (1.28 (2.30))         | (1.52 (2.68))          | (-2.51)  | (4.90 (3.99))         | (4.39 (4.05))          | (1.20)   |
| Ordering & Repeating    |                       |                        |          | 3.34 (3.93)           | 4.81 (4.72)            | -2.45*   |
|                         |                       |                        |          | {4.83 (4.20)}         | {6.25 (4.70)}          | {-1.84}  |
|                         | (0.45 (1.11))         | (0.78 (1.94))          | (-1.51*) | (1.74 (2.16))         | (1.35 (2.01))          | (1.75)   |
| OCD Total               |                       |                        |          | 22.89 (22.45)         | 30.69 (22.38)          | -2.55*   |
|                         |                       |                        |          | {31.77 (25.02)}       | {36.70 (21.39)}        | {-1.23}  |
|                         | (6.98 (9.72))         | (8.93 (11.74))         | (-3.38)  | (20.26 (15.29))       | (18.82 (14.52))        | (0.91)   |

Note: CLIN, {OCDS}, (COS); parent form: COS: boys: n=146 girls: n=221; self-report form: CLIN: boys: n=123, girls: n=95; OCD: boys: n=65, girls: n=69; COS: boys: n=146, girls: n=221;  
\*p<.05, \*\*p<=.01
